# Supplementary material
Source: PubMed Central journal article supplement (PMC3641666)
Supplement: NIHMS460931-supplement-Supporting_Information.pdf [file NIHMS460931-supplement-Supporting_Information.pdf]

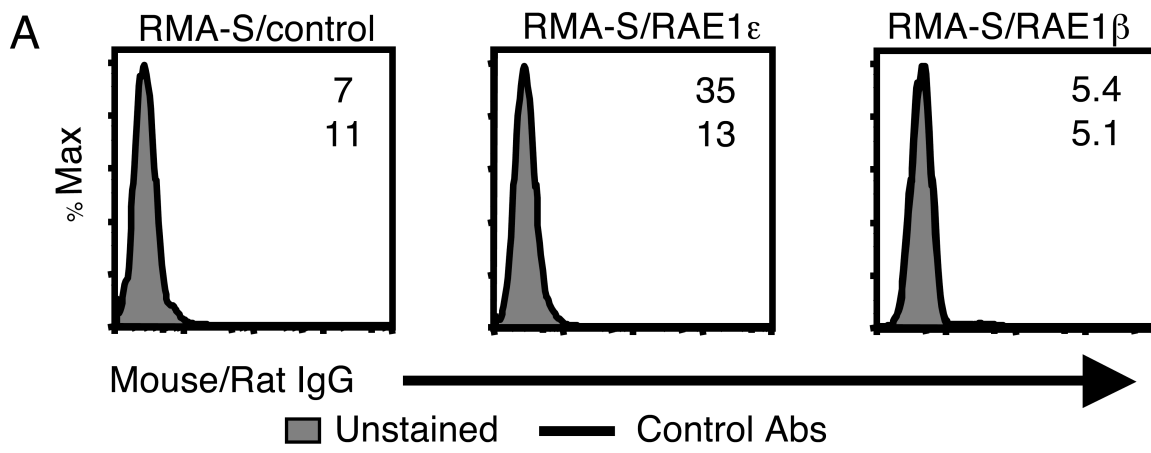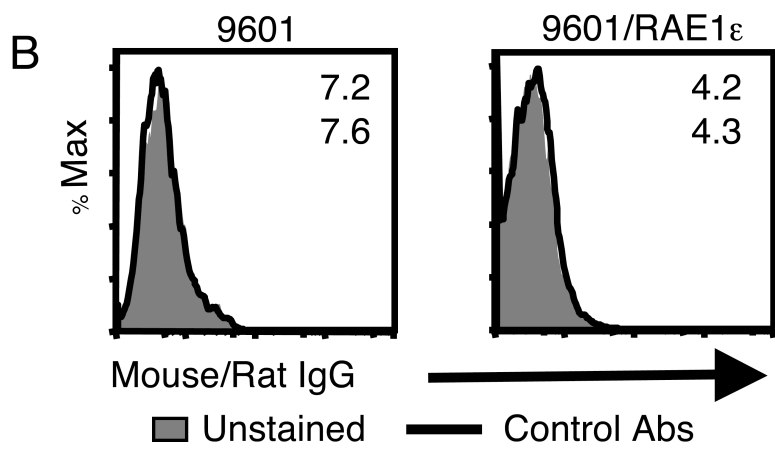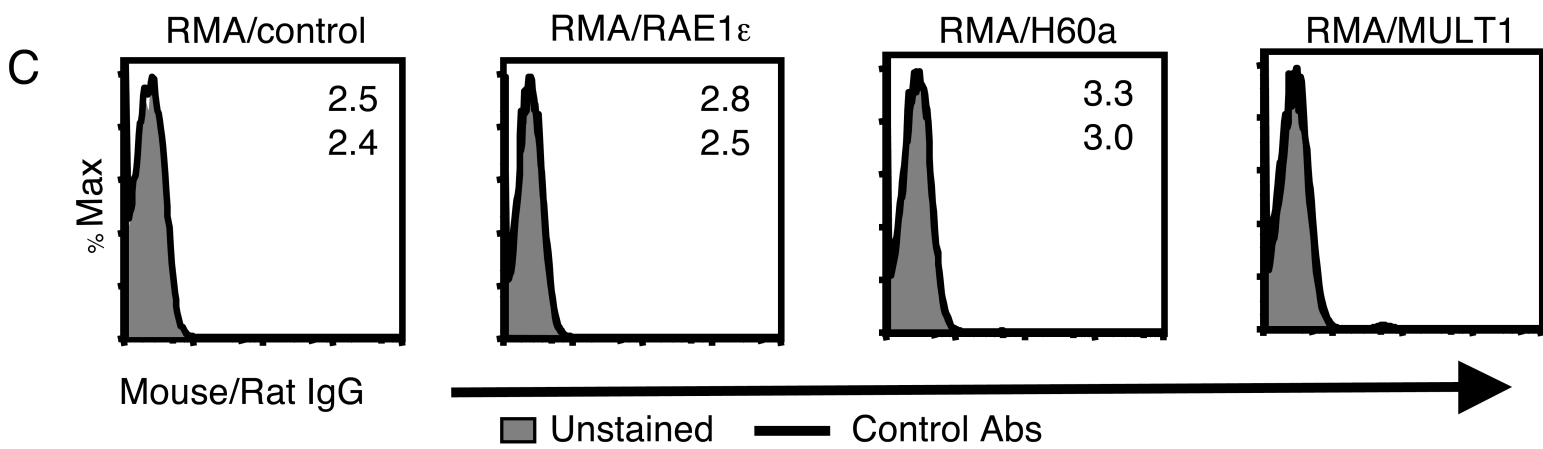

**A**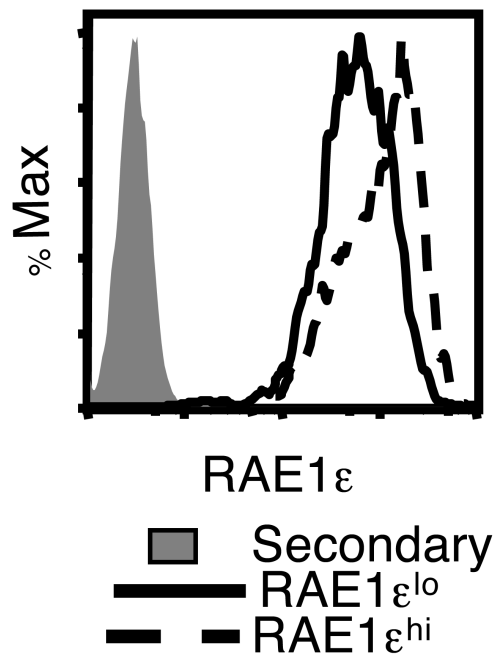**B**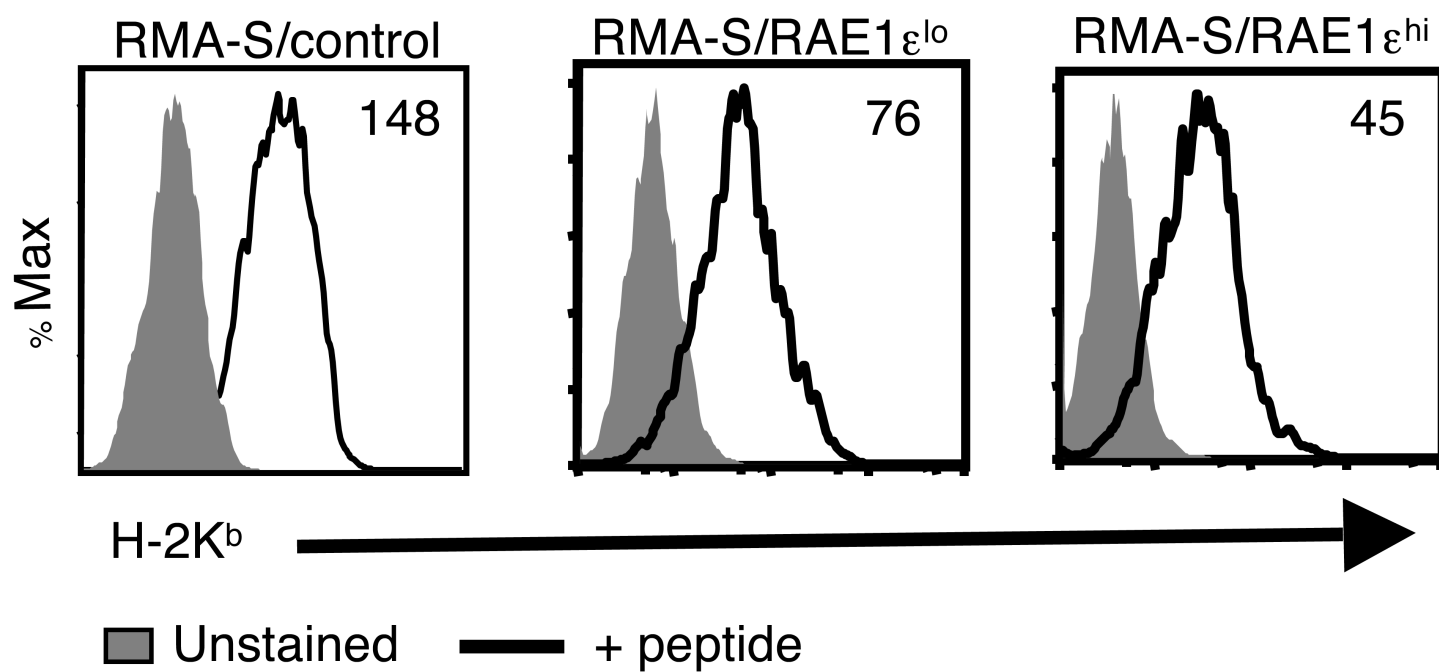

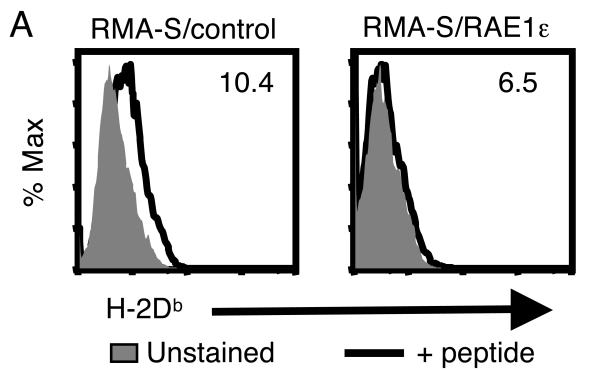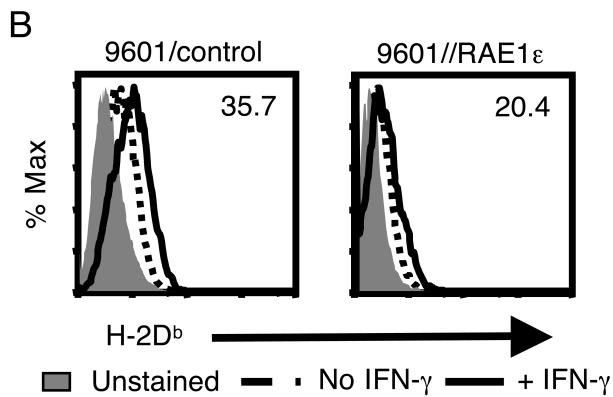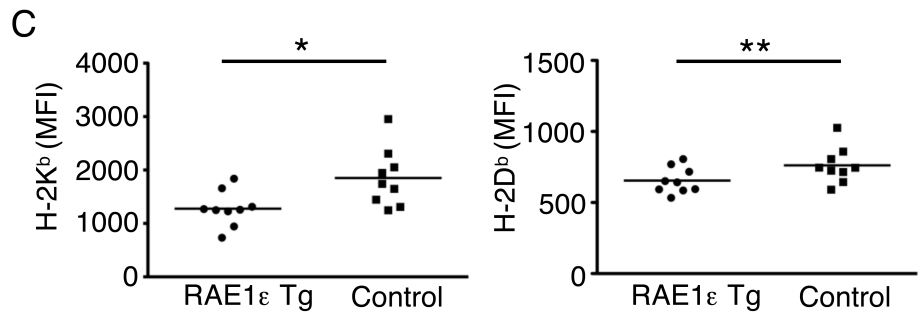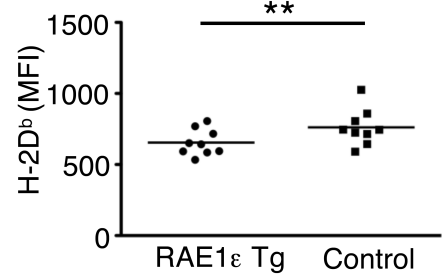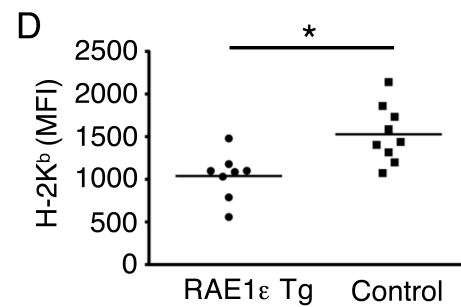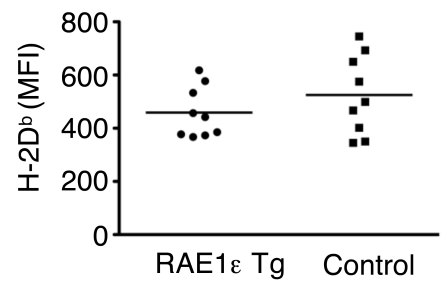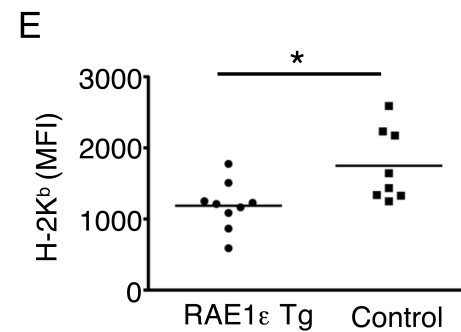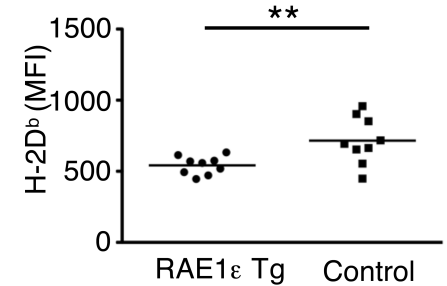

**B**

RMA-S/Control

RMA-S/RAE1 $\epsilon$

8

2

% Max

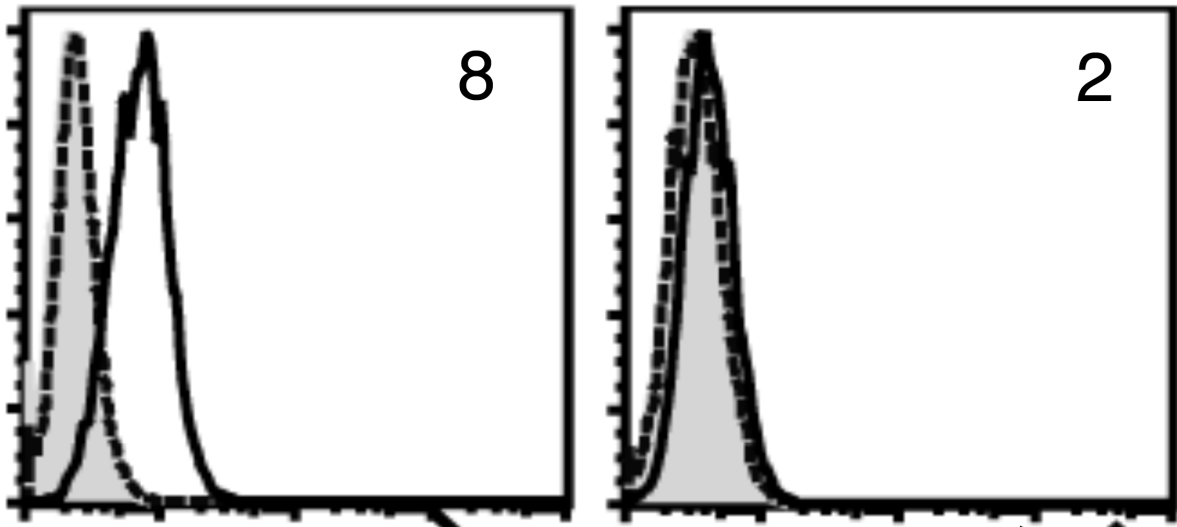

■ Unstained    - - - No peptide    — + peptide

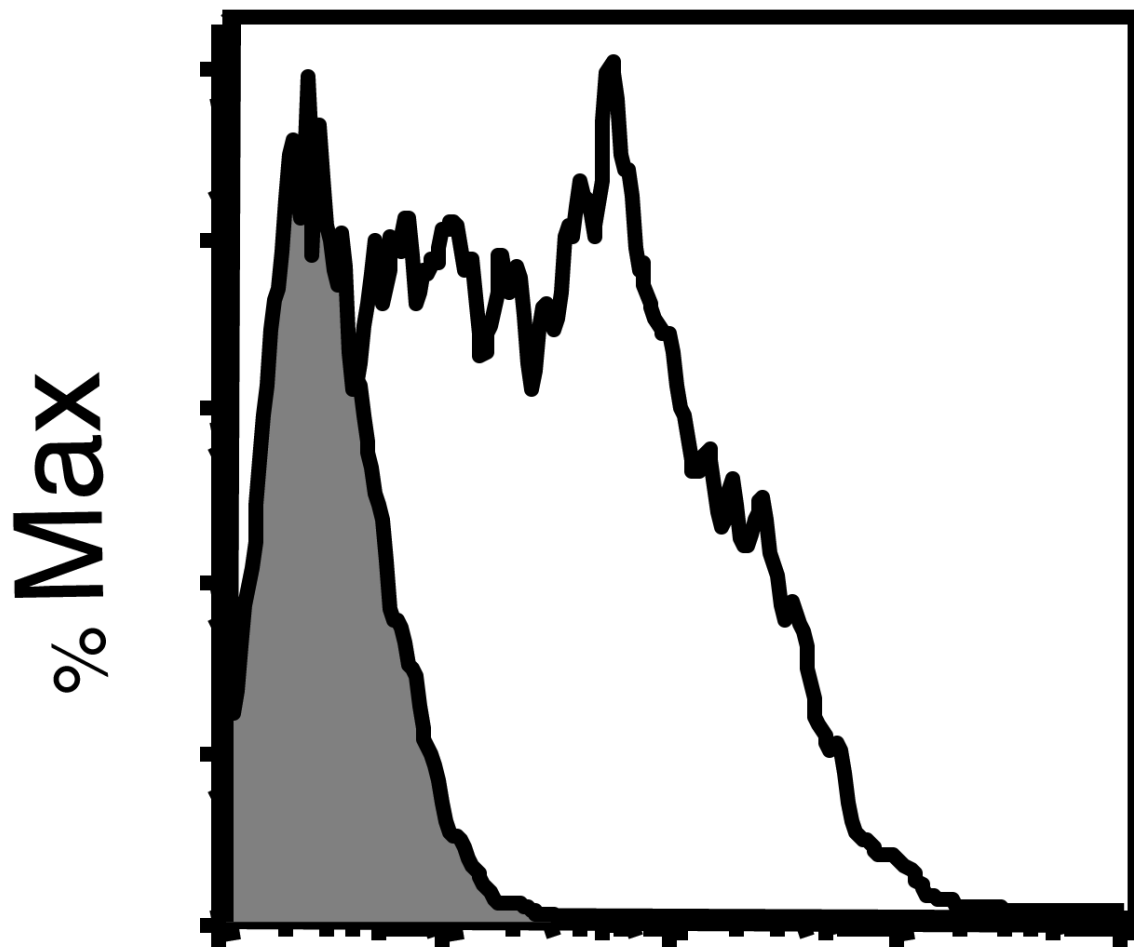

H-2D<sup>k</sup>

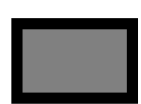

Unstained

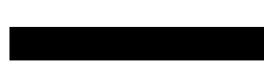

H-2D<sup>k</sup>

A

RMA/control

RMA/RAE1 $\epsilon$

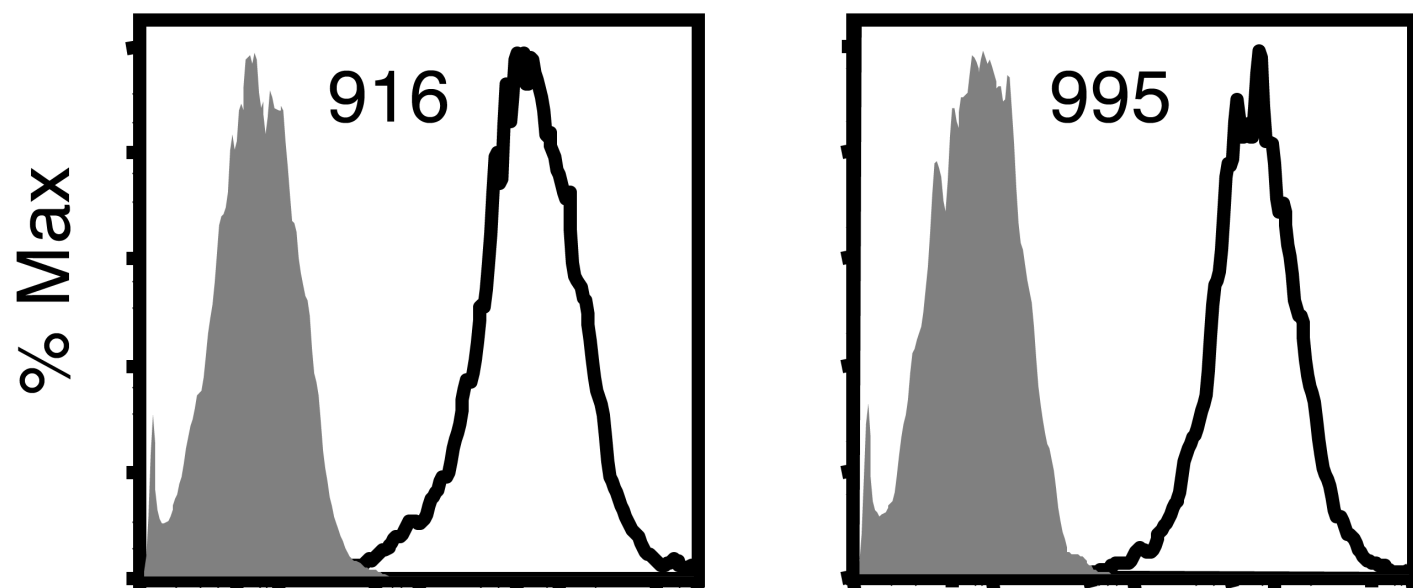

H-2K<sup>b</sup>

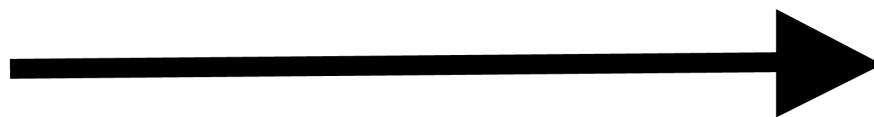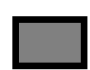

unstained

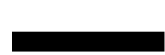

H-2K<sup>b</sup>

**SUPPORTING INFORMATION FIGURE 1. Minimal background staining on RMA-S, RMA and 9601 cell lines with control antibodies.** (A-C) RMA-S (A), 9601 (B) or 9601 (C) cell lines were stained with a directly conjugated control mouse IgG (H-2<sup>b</sup> control) or control rat IgG (NKG2D ligand control) followed by a conjugated anti-rat IgG secondary. The MFIs of unstained cells (top number) and cells stained with control antibodies (bottom number) are shown.

**SUPPORTING INFORMATION FIGURE 2. Inverse relationship between RAE1 $\epsilon$  and MHC class I expression.** (A) RMA-S/RAE1 $\epsilon^{\text{hi}}$  and RMA-S/RAE1 $\epsilon^{\text{lo}}$  cells were stained with a RAE1 $\epsilon$ -specific or secondary antibody and analyzed by flow cytometry. (B) RMA/control, RMA-S/RAE1 $\epsilon^{\text{hi}}$  and RMA-S/RAE1 $\epsilon^{\text{lo}}$  cells were cultured with or without SIINFEKL peptide (1 $\mu$ M) for 16 hours and stained with a H-2K<sup>b</sup>-specific antibody. The MFIs of H-2K<sup>b</sup> staining are shown.

**SUPPORTING INFORMATION FIGURE 3. Ectopic expression of RAE1 $\epsilon$  results in decreased MHC class I surface expression.** (A) The RMA-S/Control and RMA-S/RAE1 $\epsilon$  cell lines were cultured with or without SIINFEKL peptide (1 $\mu$ M) for 16 hours, stained with a H-2D<sup>b</sup>-specific antibody and analyzed by flow cytometry. (B) The 9601/control and 9601/RAE1 $\epsilon$  cell lines were cultured with or without IFN- $\gamma$  (1000U/ml) for 48 h, stained with a H-2D<sup>b</sup>-specific antibody, and analyzed by flow cytometry. (C) Total PBMC from RAE1 $\epsilon$  transgenic (n=9) and non-transgenic (n=9) mice were stained with H-2K<sup>b</sup>-specific (left panel) or H-2D<sup>b</sup>-specific (right panel) antibodies and analyzed by flow cytometry. (D) PBMC from (C) gated on CD3 $\epsilon^+$  cells. (E) PBMC from (C) gated on B220<sup>+</sup> cells. \*p<0.01, \*\*p<0.05.

**SUPPORTING INFORMATION FIGURE 4. MHC class I expression on target cells.** The target cells used in Fig. 2E were stained with a H-2K<sup>b</sup>-specific antibody and analyzed by flow cytometry.

**SUPPORTING INFORMATION FIGURE 5. MHC class I expression on RAW 264.7 cells.** Untransfected RAW 264.7 cells were stained with an H-2D<sup>k</sup> antibody.

**SUPPORTING INFORMATION FIGURE 6. Ectopic expression of RAE1 $\epsilon$  does not decrease total MHC class I expression.** RMA/control and RMA/RAE1 $\epsilon$  cells were fixed, permeabilized, and stained with a H-2K<sup>b</sup>-specific antibody and analyzed by flow cytometry. The MFIs of H-2K<sup>b</sup> staining are shown.



## **Supplementary Materials and Methods**

### *Cell line generation*

RMA-S/RAE1 $\epsilon^{\text{hi}}$  and RMA-S/RAE1 $\epsilon^{\text{lo}}$  cell lines were isolated by sorting for different levels of EGFP expression using a FACSVantage SE cell sorter (BD Biosciences).

### *Antibodies*

Control mouse IgG2b (clone 27-35) and rat IgG2a (clone # R35-95) were purchased from BD Biosciences. H-2D<sup>b</sup>-specific (clone #KH95), CD3 $\epsilon$ -specific (clone #500A2), and B220-specific (clone # RA3-6B2) antibodies were purchased from BD Biosciences.

### *Intracellular staining*

Cells were fixed with 4% paraformaldehyde (Sigma-Aldrich) and permeabilized with 0.01 Saponin (Sigma-Aldrich). They were then stained with antibody and analyzed on a FACScan (BD Biosciences).
